# Supplementary material
Source: publisher figshare collection journal article supplement (https://acs.figshare.com/ndownloader/files/4221442)

## **Supporting Information for Publication**

Figure S1 Schematic diagram of vertical flow constructed wetland units.

Figure S2 Rarefaction analysis of anammox bacterial communities in activated sludge and CW-C.

Table S1 Primer set used in this study for amplifying anammox bacteria

Table S2 The layout of OTU number and related anammox sequences accession numbers in the tree

**Figure S1**

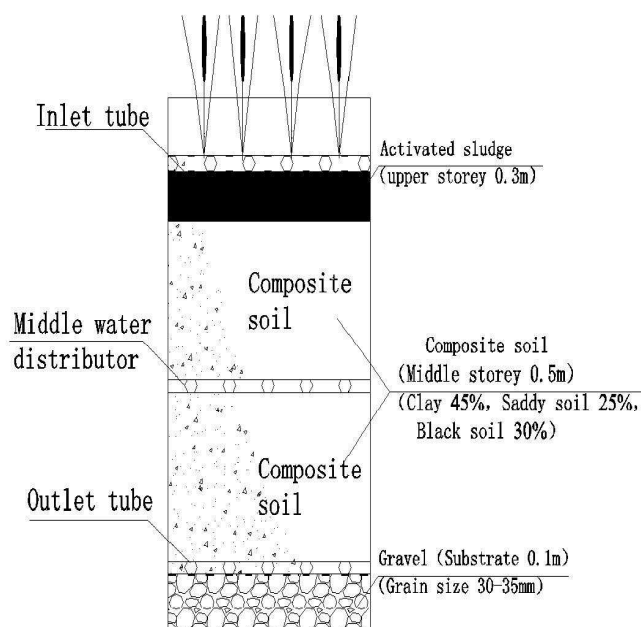

**Figure S2**

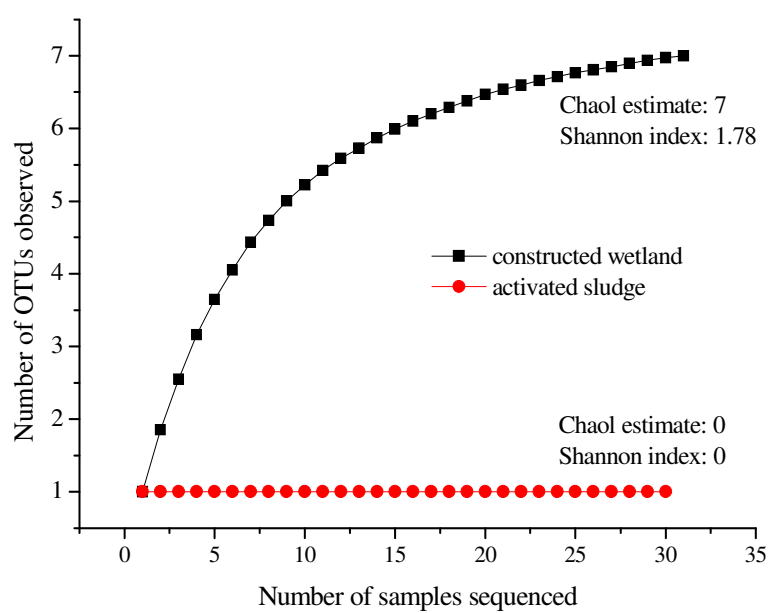

Table S1 Primer set used in this study for amplifying anammox bacteria

| Primer  | Sequence (5'-3')       | Specificity    | Position | References |
|---------|------------------------|----------------|----------|------------|
| PLA46f  | GACTTGCATGCCTAATCC     | Planctomycetes | 46       | 28         |
| 630r    | CAKAAAGGAGGTGATCC      | Bacteria       | 1529     | 29         |
| Amx368f | TTCGCAATGCCCCGAAAGG    | Anammox 16S    | 368–385  | 30         |
| Amx820r | AAAACCCCTCTACTTAGTGCCC | Anammox 16S    | 820–841  |            |

Table S2 The layout of OTU number and related anammox sequences accession numbers in the tree

| OTU    | Sequence number | Sequence ID                                                                                                                                                                                                                               | Accession number(s)                                                                                          | The close match anammox bacteria               |
|--------|-----------------|-------------------------------------------------------------------------------------------------------------------------------------------------------------------------------------------------------------------------------------------|--------------------------------------------------------------------------------------------------------------|------------------------------------------------|
| OTU 0# | 30              | as2-1, as2-2, as2-3, as2-4, as2-5, as2-11, as2-12, as2-13, as2-14, as2-15, as2-31, as2-32, as2-33, as2-34, as2-35, as2-41, as2-26, as2-36, as2-46, as2-56, as2-38, as2-37, as2-39, as2-98, as2-97, as2-47, as2-27, as2-48, as2-86, as2-87 | JF346172-JF346201                                                                                            | <i>Candidatus</i> 'Brocadia fulgida'           |
| OTU 1# | 4               | cw-19-11,cw-19-1,cw-19-2,cw-19-21                                                                                                                                                                                                         | JF346225, JF346215, JF346216, JF346226                                                                       | <i>Candidatus</i> 'Jettenia asiatica'          |
| OTU 2# | 2               | cw-23-1,cw-23-11                                                                                                                                                                                                                          | JF346221, JF346231                                                                                           | <i>Candidatus</i> 'Jettenia asiatica'          |
| OTU 3# | 3               | cw-4-2,cw-4-3,cw-8-1                                                                                                                                                                                                                      | JF346206, JF346207, JF346208                                                                                 | <i>Candidatus</i> 'Anammoxoglobus propionicus' |
| OTU 4# | 11              | cw-11-1,cw-11-11,cw-23-3,cw-23-31,cw-19-31,cw-19-3,cw-9-2,cw-2-1,cw-11-3,cw-11-31,cw-8-2                                                                                                                                                  | JF346213, JF346223, JF346222, JF346232, JF346227, JF346217, JF346211, JF346202, JF346214, JF346224, JF346209 | <i>Candidatus</i> 'Anammoxoglobus propionicus' |
| OTU 5# | 2               | cw-21-2,cw-21-21                                                                                                                                                                                                                          | JF346219, JF346229                                                                                           | <i>Candidatus</i> 'Brocadia fulgida'           |
| OTU 6# | 2               | cw-2-2,cw-2-3                                                                                                                                                                                                                             | JF346203, JF346204                                                                                           | <i>Candidatus</i> 'Brocadia anammoxidans'      |
| OTU 7# | 7               | cw-4-1,cw-8-3,cw-21-1,cw-21-11,cw-9-3,cw-21-3, cw-21-31                                                                                                                                                                                   | JF346205, JF346210, JF346218, JF346228, JF346212, JF346220, JF346230                                         | <i>Candidatus</i> 'Brocadia anammoxidans'      |

## Overview of experimental set up

### Step 1: Constructing the wetlands

Two similar 1 m<sup>3</sup> CW tanks built in April 2008

### Step 2: Time is zero controls and adding nitrifying/anammox sludge to CW-C

The sludge containing nitrifying and anammox bacteria was added to CW-C in March 2009  
Before the incubation

- The PCR with CW-A and CW-C soil were done (No anammox was amplified).
- The biodiversity, abundance and activity of anammox bacteria of the sludge were investigated
- The potential nitrification rate (PNR) of CW-A and CW-C were investigated

### Step 3: five month incubation

After the incubation the <sup>15</sup>N tests were done on Sep 2<sup>nd</sup>, 2009 in CW-C and CW A  
furthermore in CW C anammox diversity and PNR were determined

- After the incubation, the (q)PCR with CW-C soil was done to investigate the anammox biodiversity and abundance.
- The isotopic <sup>15</sup>N test were done in CW A and CW C
- The potential nitrification rate of CW-C was investigated after the incubation

### Step 4: effect on N<sub>2</sub>O emission

The effect of anammox on reducing N<sub>2</sub>O flux was done on April 20<sup>th</sup> 2010  
CW A and CW C were operated under the same temperature, influent loading, retention time, sampling time to compare the N<sub>2</sub>O flux in CW-A (no anammox) and CW-C (with anammox bacteria and activity).

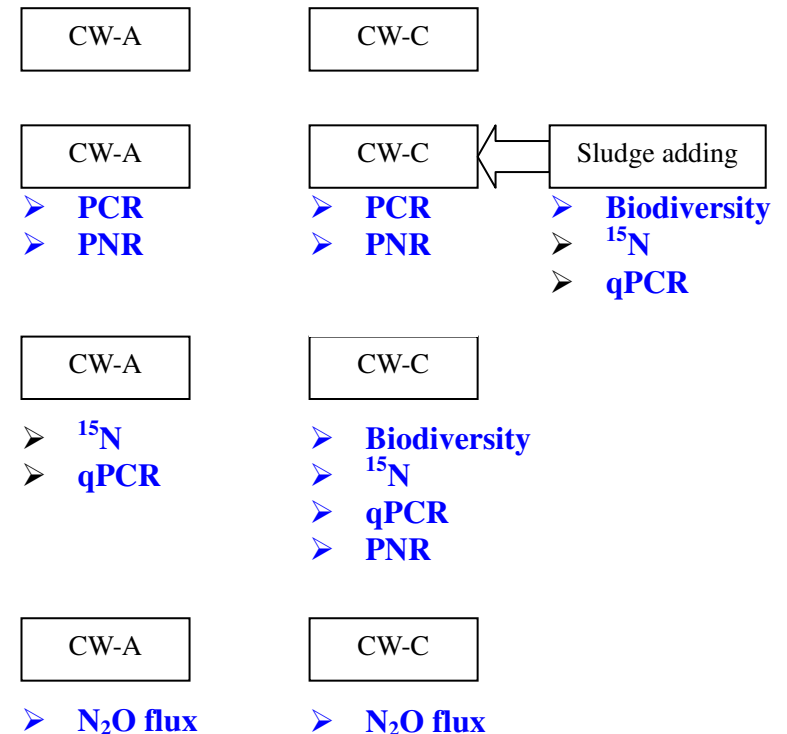

Supplement: Supplementary file 1 [file 4221442]
